# Supplementary material
Source: PubMed Central journal article supplement (PMC7682408)
Supplement: pnas.2010984117.sapp.pdf [file pnas.2010984117.sapp.pdf]

## Supplementary Information

### **Curtailing FGF19's Mitogenicity by Suppressing its Receptor Dimerization Ability**

Jianlou Niu<sup>1,#</sup>, Jing Zhao<sup>1,2,#</sup>, Jiamin Wu<sup>1,#</sup>, Guanting Qiao<sup>1</sup>, Junlian Gu<sup>3</sup>, Chuanren Zhou<sup>1</sup>, Qi Li<sup>1</sup>, Lei Ying<sup>4</sup>, Dezhong Wang<sup>5</sup>, Huan Lin<sup>1</sup>, Xiaokun Li<sup>1</sup>, Zhifeng Huang<sup>1,\*</sup>, Moosa Mohammadi<sup>6,\*</sup>

<sup>1</sup>School of Pharmaceutical Science, Wenzhou Medical University, Wenzhou, Zhejiang 325035, China.

<sup>2</sup>Department of Pharmacy, Zhejiang Hospital, Hangzhou, Zhejiang 310030, China

<sup>3</sup>School of Nursing, Shandong University, Jinan, Shandong 250100, China.

<sup>4</sup>School of Basic Medical Sciences, Wenzhou Medical University, Wenzhou, Zhejiang 325035, China.

<sup>5</sup>School of Life and Environmental Science, Wenzhou University, Wenzhou, Zhejiang, 325035, China.

<sup>6</sup>Department of Biochemistry & Molecular Pharmacology, School of Medicine, New York University, New York, NY 10016, United States.

#These authors contributed equally to this work.

\*To whom correspondence should be addressed:

Email: hzf@wmu.edu.cn (Huang ZF) or moosa.mohammadi@nyumc.org (Mohammadi M)

Figure S1

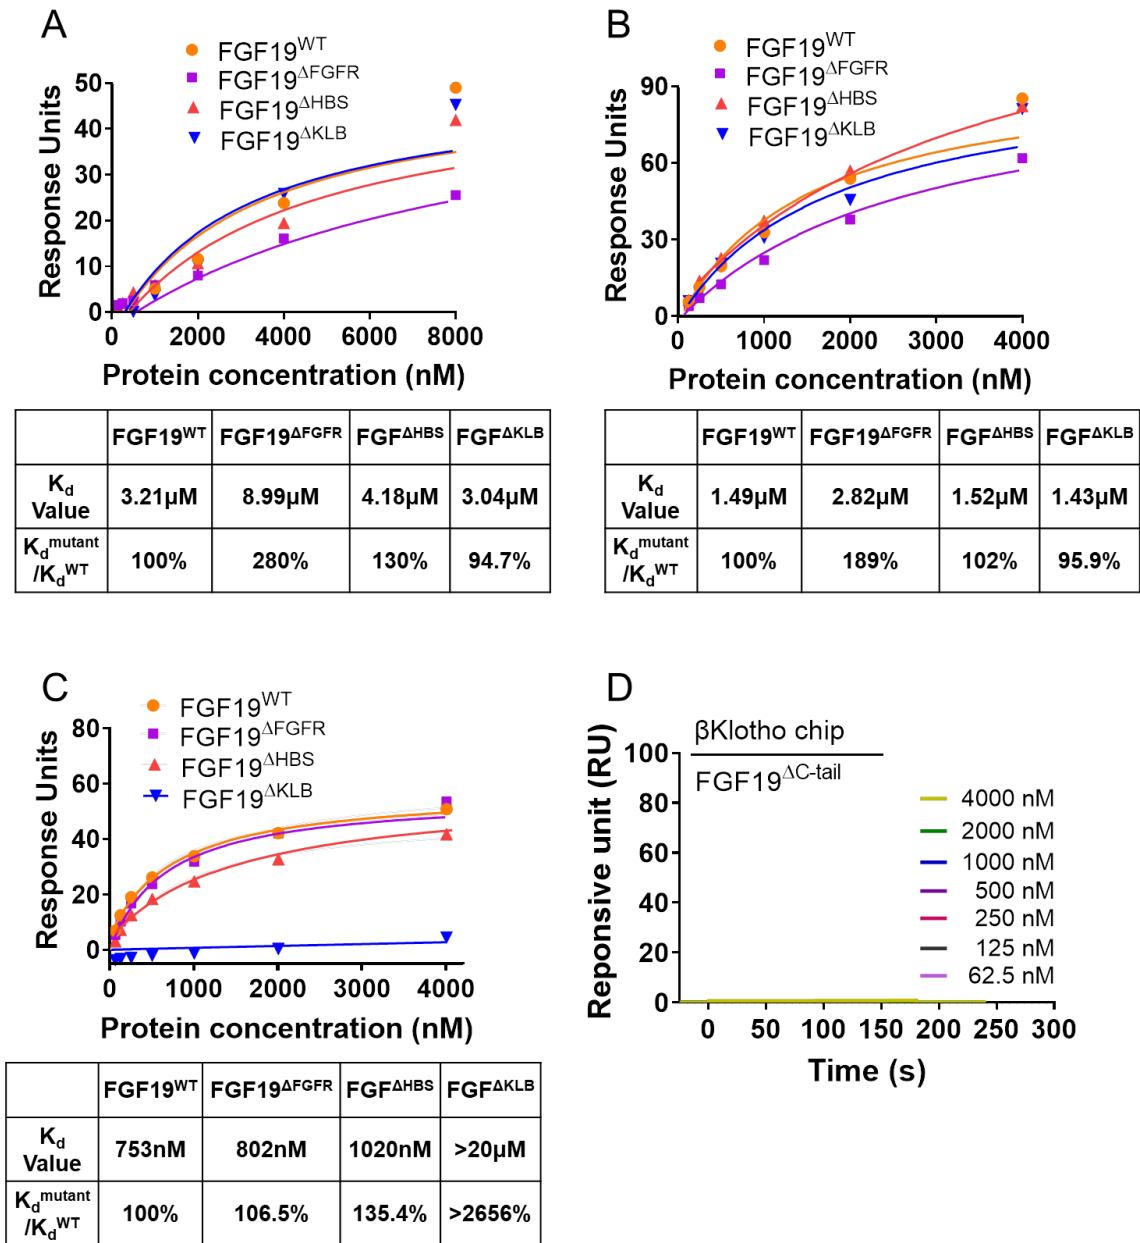

**Figure S1. Binding affinities of FGF19<sup>WT</sup> and its variants to FGFR4, FGFR1 and  $\beta$ Klotho (KLB).** (A-C) Equilibrium binding responses obtained by passing increasing concentrations of FGF19<sup>WT</sup> or its variants over sensor chips containing FGFR4 (A), FGFR1c (B) or KLB (C) were plotted as a function of analyte (FGF19<sup>WT</sup> and its variants) concentration. Equilibrium dissociation constants ( $K_d$  values)

were derived from saturation binding curves (upper panels), and ratios of  $K_d^{\text{mutant}}/K_d^{\text{WT}}$  were determined (lower panels). **(D)** Representative SPR sensorgram showing the absence of binding of FGF19 $^{\Delta\text{C-tail}}$  to KLB.

## Figure S2

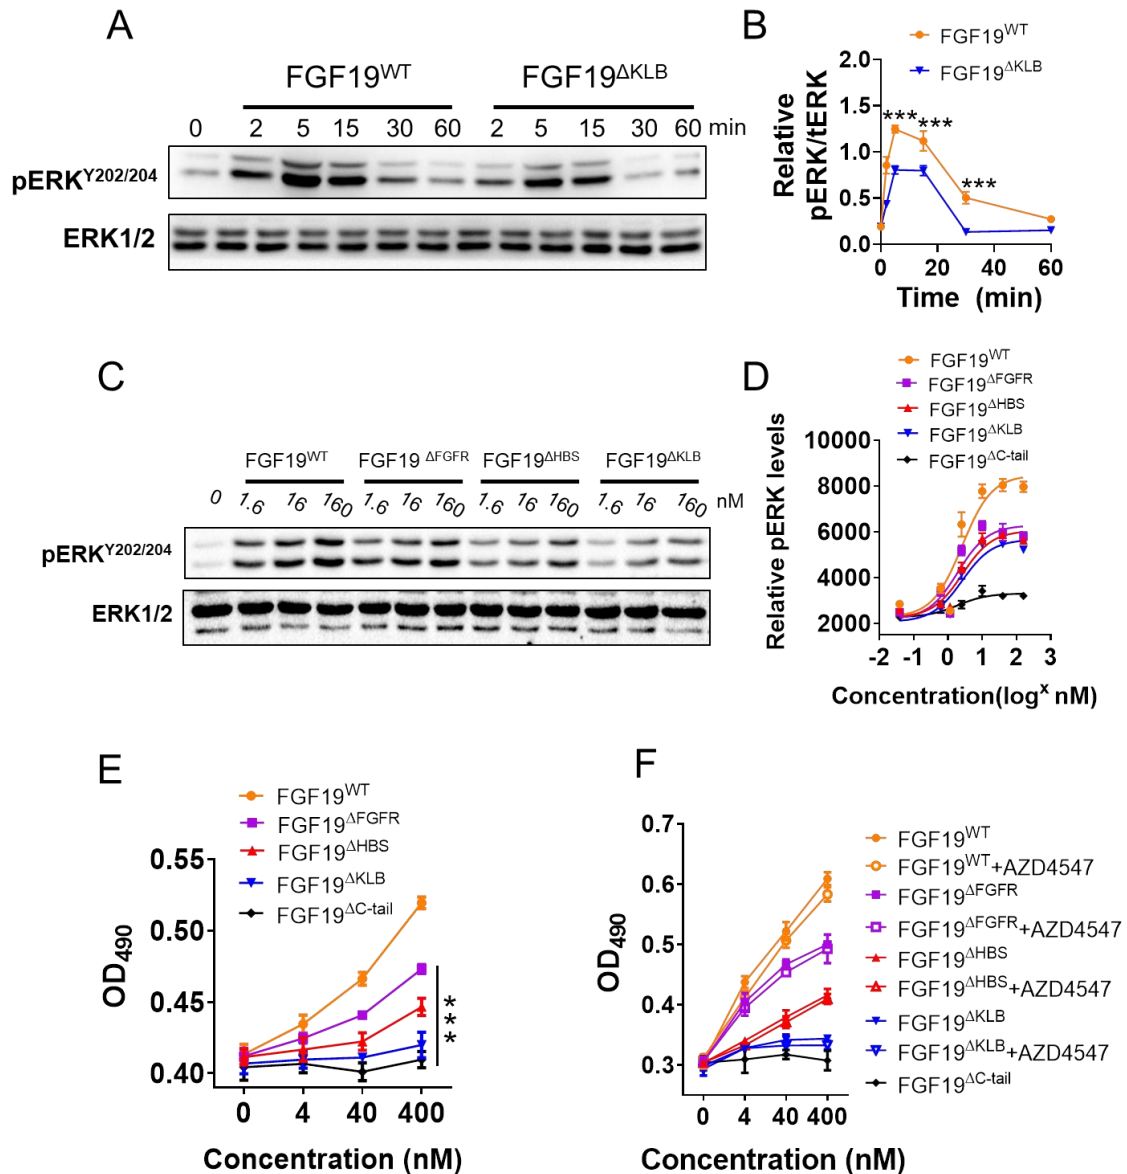

**Figure S2. Cellular response induced by FGF19<sup>WT</sup> and its variants. (A)**

Immunoblots showing time-dependent activation of the MAPK pathway (ERK1/2)

by FGF19<sup>WT</sup> and FGF19<sup>AKLB</sup> (16 nM) in HepG2 cells. **(B)** Quantification by densitometry of Western blot shown in (A). Data from three independent measurements are presented as mean +/- SEM; \*\*\*p<0.001 vs FGF19<sup>AKLB</sup>. **(C)** Immunoblots showing dose-dependent activation of ERK1/2 by FGF19<sup>WT</sup>, FGF19<sup>ΔFGFR</sup>, FGF19<sup>ΔHBS</sup> and FGF19<sup>AKLB</sup> in H4IIE cells. **(D)** Homogeneous time-resolved fluorescence (HTRF) analysis of ERK1/2 phosphorylation in H4IIE cells induced by a range of concentrations of FGF19 and its variants. **(E)** *In vitro* proliferative activity determined by a MTT assay using H4IIE cells. **(F)** *In vitro* proliferative activity determined by a MTT assay using HepG2 cells in the absence or presence of the FGFR kinase inhibitor AZD4547. Data from three independent measurements are presented as mean +/- SEM; \*\*\*p<0.001 vs FGF19<sup>WT</sup>.

Figure S3

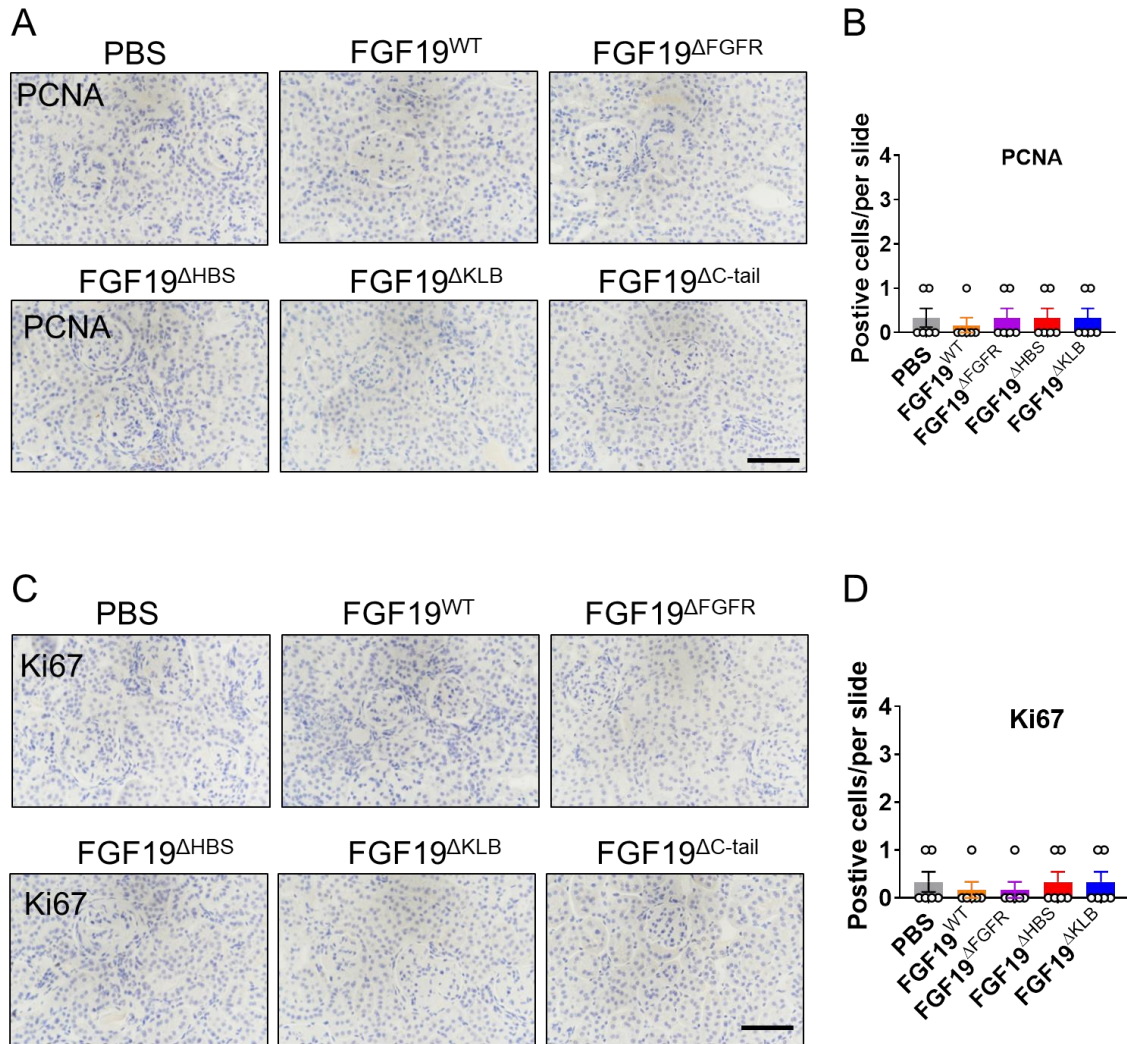

**Figure S3. Mitogenic activity of FGF19<sup>WT</sup> and its variants in *db/db* mouse kidney tissue.** *db/db* mice were injected i.p. daily for 1 month with either FGF19<sup>WT</sup>, FGF19<sup>ΔFGFR</sup>, FGF19<sup>ΔHBS</sup>, FGF19<sup>ΔKLB</sup>, or FGF19<sup>ΔC-tail</sup> (all at 21 nmol/kg of body weight) or with PBS as a control. Panels show representative immunohistochemical staining of PCNA (**A**) and Ki67 (**C**) in kidney tissue sections and corresponding quantification by counting the number of positive dots per slide (**B,D**). Data are presented as mean +/- SEM (n=6); scale bar, 100  $\mu$ m.

## Figure S4

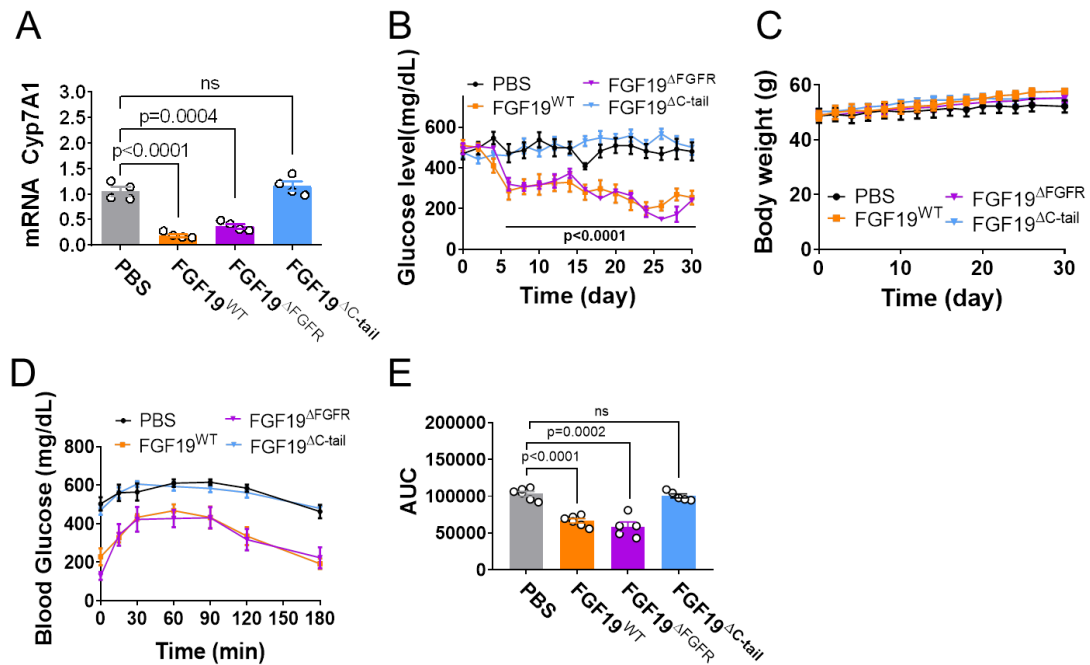

**Figure S4. Bile acid and glucose homeostatic activities of FGF19<sup>ΔFGFR</sup> and FGF19<sup>ΔC-tail</sup>.** (A) Real-time PCR analysis of *Cyp7A1* in *db/db* mouse liver extracts 4 h after i.p. injection of FGF19<sup>WT</sup>, FGF19<sup>ΔFGFR</sup>, or FGF19<sup>ΔC-tail</sup> (all at 21 nmol/kg body weight); mice treated with PBS buffer served as controls. (B-E) Blood glucose (B), body weight (C), GTT (D), and integrated area under the curves (AUC) (E) for changes in blood glucose levels of ad libitum-fed *db/db* mice injected daily with FGF19<sup>WT</sup>, FGF19<sup>ΔFGFR</sup> or FGF19<sup>ΔC-tail</sup> for 1 month; mice treated with PBS buffer served as controls. Data are presented as mean values ± SEM (n=5-6); a value of P<0.05 was considered statistically significant.

Figure S5

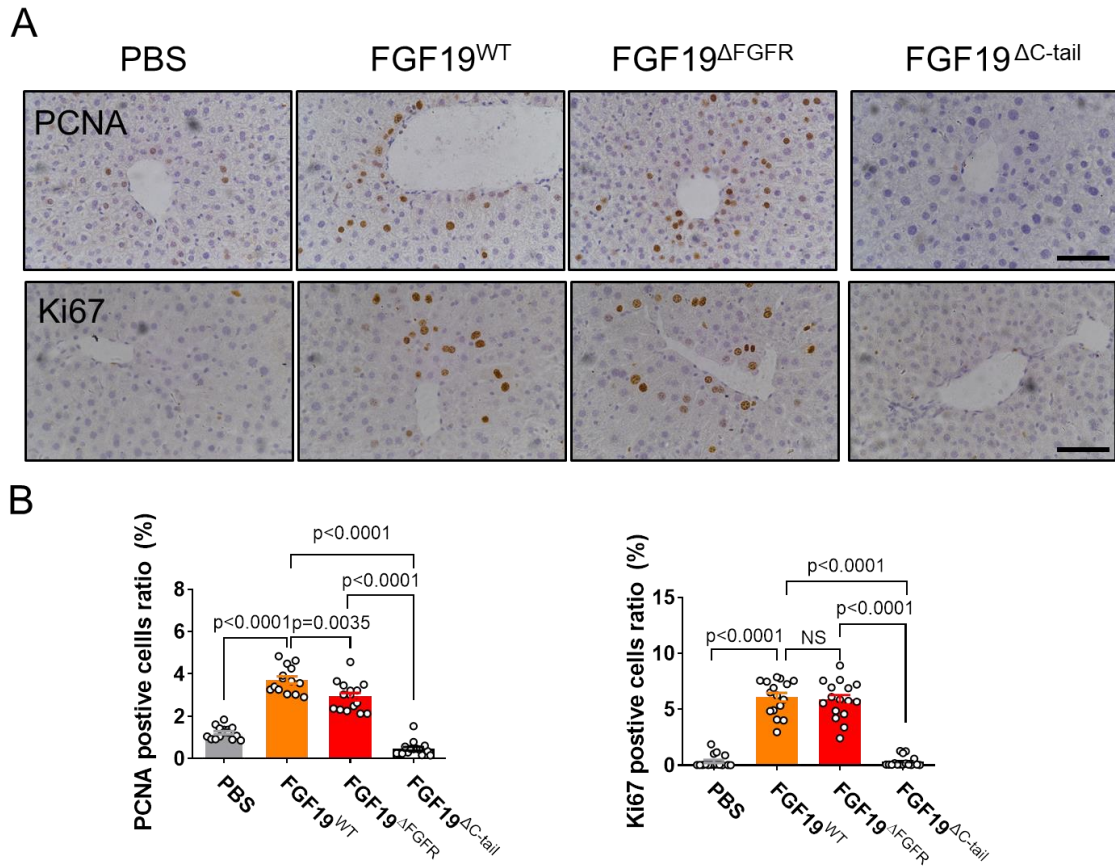

**Figure S5. Mitogenic activity of FGF19<sup>ΔFGFR</sup> or FGF19<sup>ΔC-tail</sup> in *db/db* mouse liver tissue.** (A,B) *db/db* mice were injected i.p. daily for 1 month with either FGF19<sup>WT</sup>, FGF19<sup>ΔFGFR</sup>, or FGF19<sup>ΔC-tail</sup> (all at 21 nmol/kg of body weight), or with PBS buffer (as a control). Panels show representative immunohistochemical staining of PCNA and Ki67 (A) and their corresponding quantitative analysis (B) done on 2-3 images of randomly selected areas from six different mice per treatment group. Data are presented as mean values ± SEM (n=15-16); a value of p<0.05 was considered to be statistically significant; scale bar, 100 μm.



Figure S6

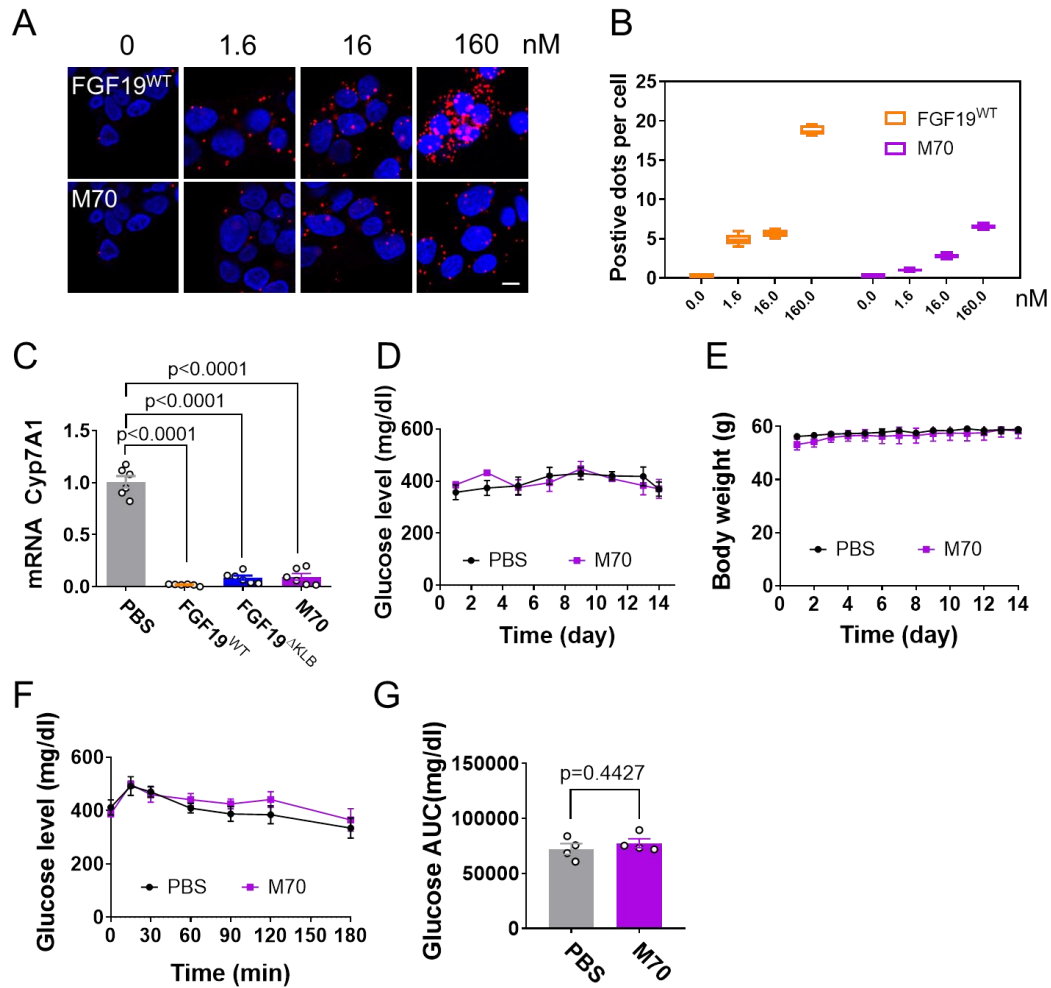

**Figure S6. M70 retains BA regulation activity but lacks the glucose-lowering effect of FGF19<sup>WT</sup>.** **(A)** Proximity ligation assay (PLA) analysis of FGFR4 dimerization strength induced by FGF19<sup>WT</sup> and M70 at 0, 1.6, 16, and 160 nM; scale bar: 10  $\mu$ m. **(B)** Quantification of PLA in panel A by counting the number of positive dots per nucleus. **(C)** Real-time PCR analysis of *Cyp7A1* mRNA levels in C57BL/6J liver extracts 4 hrs after injection of FGF19<sup>WT</sup>, FGF19<sup>ΔKLB</sup> or M70 (all at 21 nmol/kg of body weight); mice treated with PBS served as controls. Data are presented as mean values  $\pm$  SEM (n=6); a value of  $p < 0.05$  was considered to be



statistically significant. **(D-G)** Blood glucose (D), body weight (E), GTT (F), and integrated area under the curves (AUC) (G) for changes in blood glucose levels of ad libitum-fed *db/db* mice injected daily with M70 for 14 days; mice treated with PBS served as controls. Data are presented as mean values  $\pm$  SEM (n=4).

Figure S7

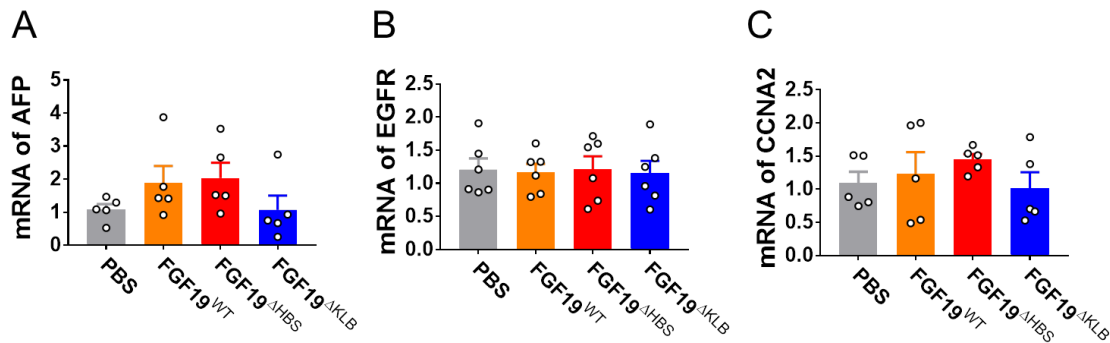

**Figure S7. Cancer related biomarkers in mouse liver after 4 weeks of treatment with FGF19<sup>WT</sup>, FGF19<sup>ΔHBS</sup> or FGF19<sup>ΔKLB</sup>.** Real-time PCR analysis of expression levels of AFP **(A)**, EGFR **(B)**, and CCNA2 **(C)** in livers of *db/db* mice injected i.p. with FGF19<sup>WT</sup>, FGF19<sup>ΔHBS</sup>, or FGF19<sup>ΔKLB</sup> (all at 21 nmol/kg of body weight) daily for 1 month; mice treated with PBS served as controls. Data are presented as mean values  $\pm$  SEM (n=5-6).

Figure S8

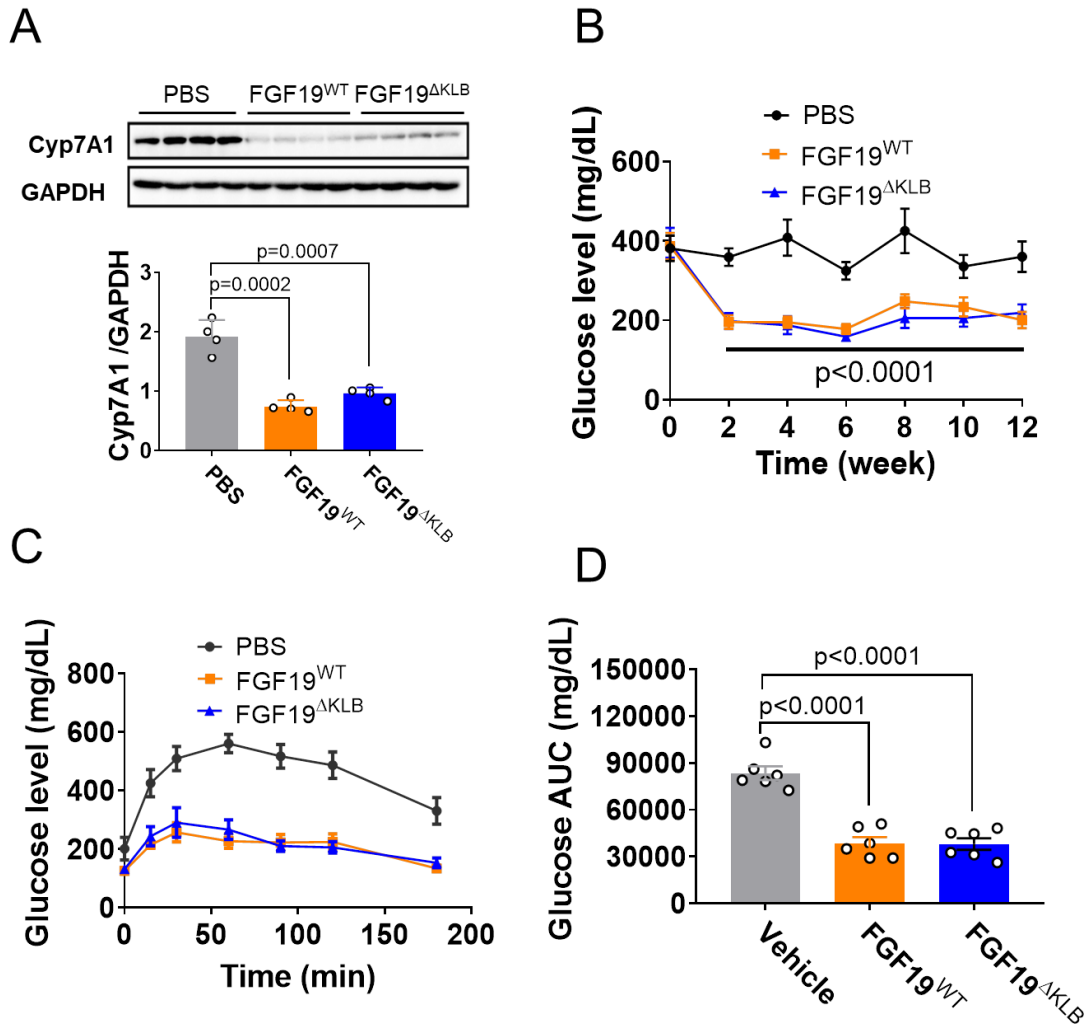

**Figure S8. Bile acid and glucose regulatory activities of FGF19<sup>WT</sup> and FGF19<sup>AKLB</sup> were sustained throughout a prolonged treatment.** Ad libitum-fed *db/db* mice were intraperitoneally administered with FGF19<sup>WT</sup> or FGF19<sup>AKLB</sup> (both at 21 nmol/kg of body weight) daily for 12 weeks; mice treated with PBS served as controls. **(A)** Cyp7A1 expression in excised liver as determined by western blotting (upper panel) and quantitated using ImageJ software (lower panel). **(B-D)** Blood glucose (B), a glucose tolerance test (GTT) (C) and the accompanying

integrated area under the curves (AUC) (D) for changes in blood glucose levels are shown. Data are presented as mean values  $\pm$  SEM (n=6); a value of  $p < 0.05$  was considered to be statistically significant.

**Table S1 Primers used in the RT-PCR**

| <b>Gene Name</b> | <b>Forward (5'-3')</b> | <b>Reverse (5'-3')</b>  |
|------------------|------------------------|-------------------------|
| $\beta$ -actin   | GGCTGTATTCCCCTCCATCG   | CCAGTTGGTAACAATGCCATGT  |
| Cyp7A1           | GGGATTGCTGTGGTAGTGAGC  | GGTATGGAATCAACCCGTTGTC  |
| AFP              | CTTCCCTCATCCTCCTGCTAC  | ACAAACTGGGTAAAGGTGATGG  |
| CCNA2            | GCCTTCACCATTCATGTGGAT  | TTGCTGCGGGTAAAGAGACAG   |
| EGFR             | GCCATCTGGGCCAAAGATAACC | GTCTTCGCATGAATAGGCCAAT  |
| Cyp8b1           | CTAGGGCCTAAAGGTTGAGT   | GTAGCCGAATAAGCTCAGGAAG  |
| Cyp27a1          | CCAGGCACAGGAGAGTACG    | GGGCAAGTGCAGCACATAG     |
| Arnt2            | TTATCAGTTTTGTGGACCCCA  | GTTGGTGCAGGTGACGTACT    |
| Lef1             | TGTTTATCCCATCACGGGTGG  | CATGGAAGTGTCGCCTGACAG   |
| Adcy1            | GTCACCTTCGTGTCCTATGCC  | TTCACACCAAAGAAGAGCAGG   |
| Axin2            | TGACTCTCCTTCCAGATCCCA  | TGCCCACACTAGGCTGACA     |
| Tcf7             | AGCTTTCTCCACTCTACGAACA | AATCCAGAGAGATCGGGGGTC   |
| Tgfa             | GGAACCTGCCGGTTTTTGG    | CACAGCGAACACCCACGTA     |
| Prom1            | GTTGAGACTGTGCCCATGAAA  | GACGGGCTTGTGATAACAGGA   |
| Nupr1            | CCCTTCCCAGCAACCTCTAAA  | TCTTGGTCCGACCTTTCCGA    |
| Etv5             | CGAGTTGTCGTCCTGTAGCC   | GGCACAATAGTTGTAGAGGCAC  |
| IL-6             | CTGCAAGAGACTTCCATCCAG  | AGTGGTATAGACAGGTCTGTTGG |
